# Supplementary material
Source: PubMed Central journal article supplement (PMC6779327)

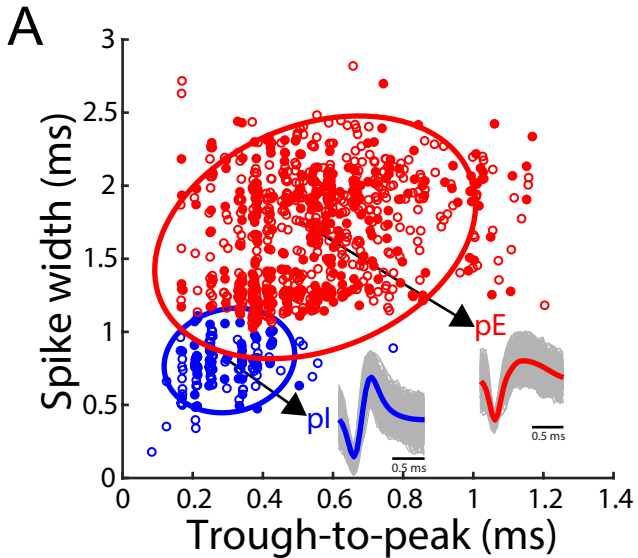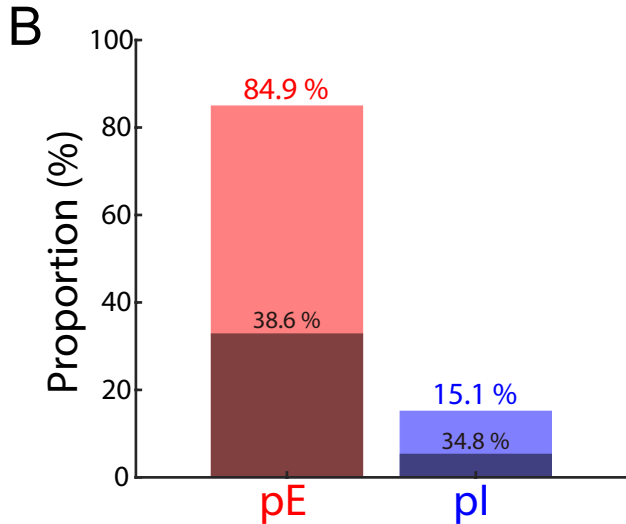

Supplement: NIHMS1538975-supplement-2.pdf [file NIHMS1538975-supplement-2.pdf]

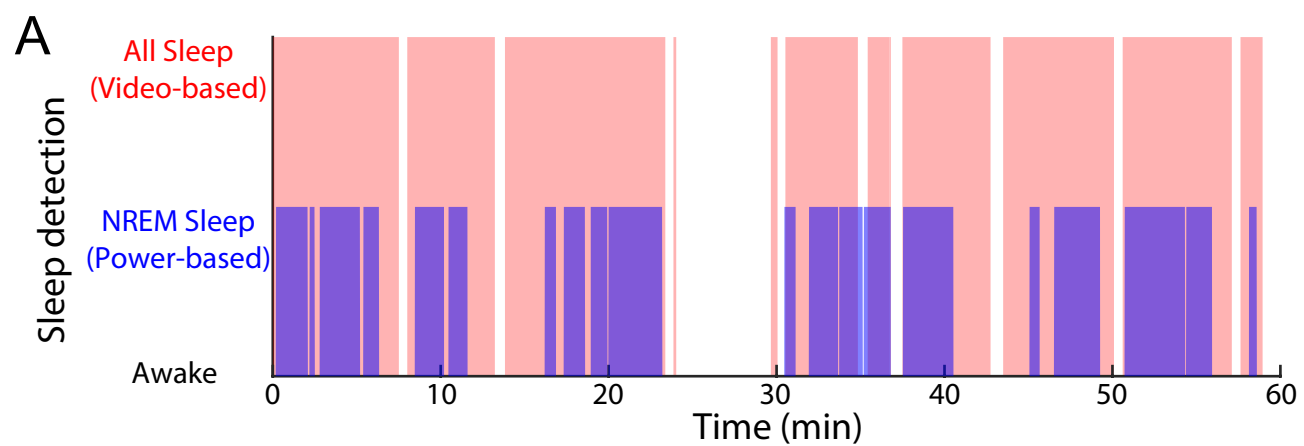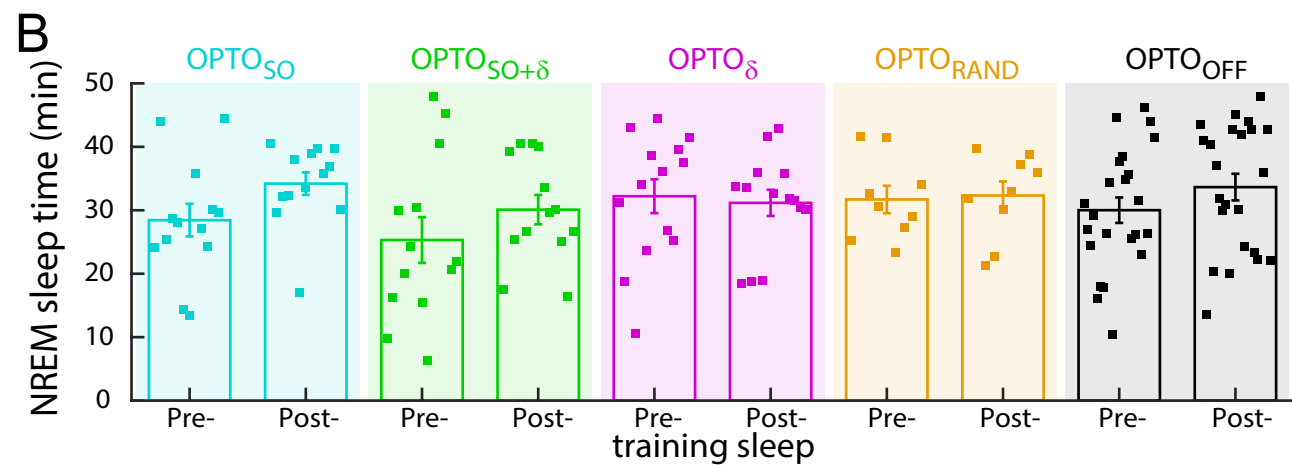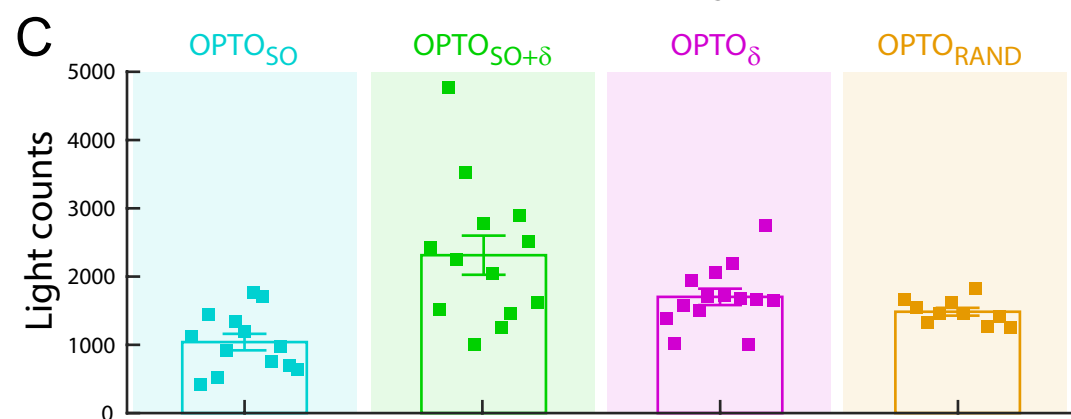

Supplement: NIHMS1538975-supplement-3.pdf [file NIHMS1538975-supplement-3.pdf]

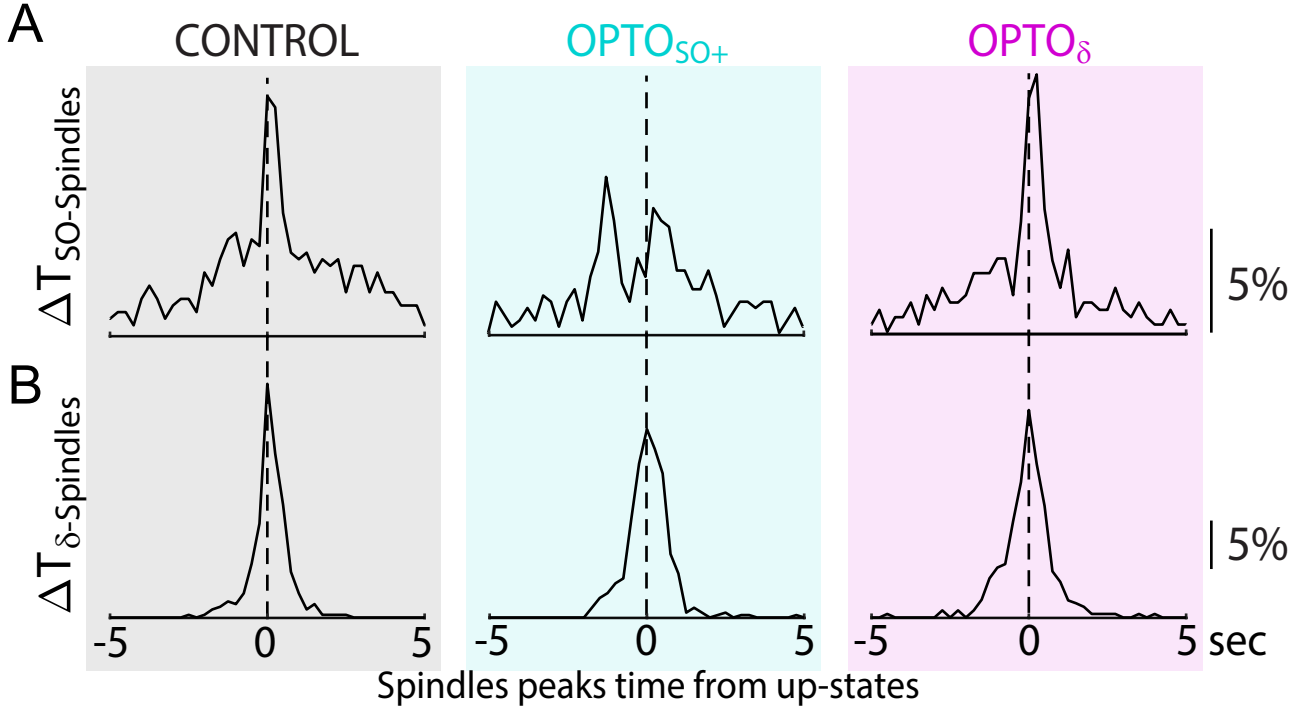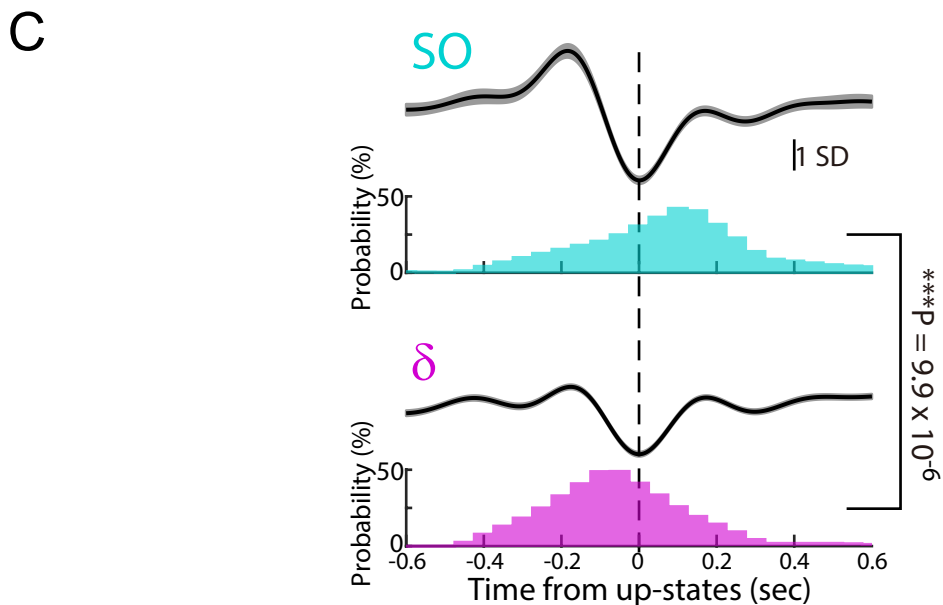

Supplement: NIHMS1538975-supplement-4.pdf [file NIHMS1538975-supplement-4.pdf]

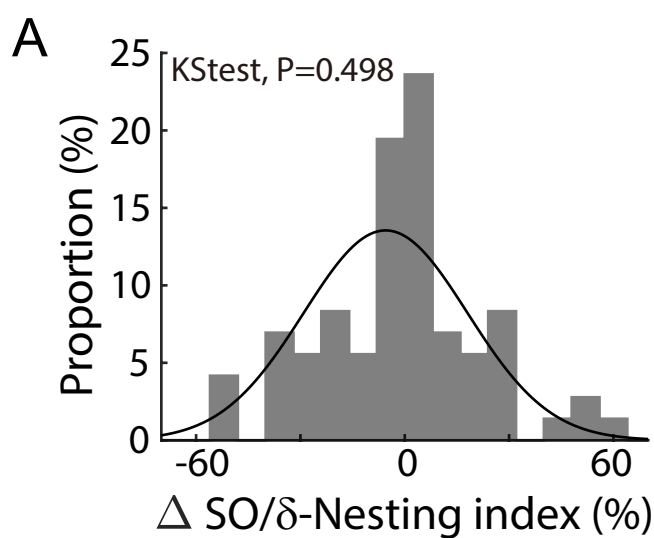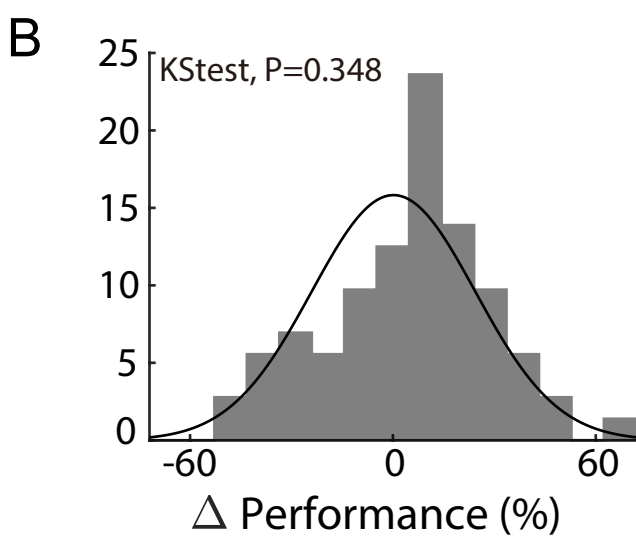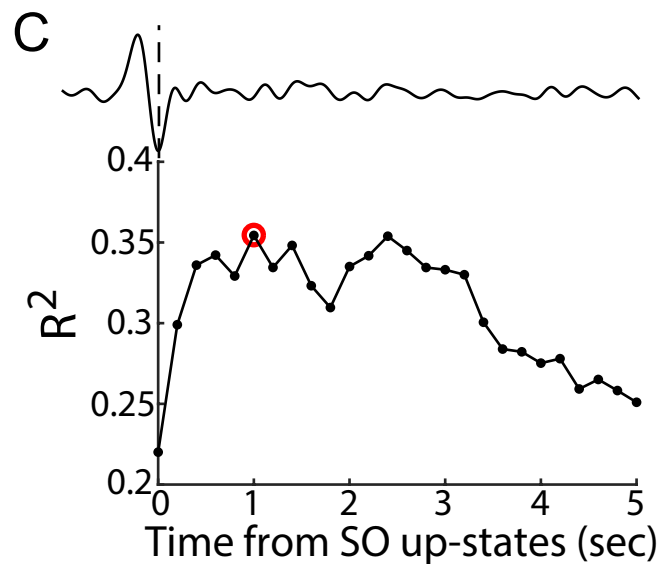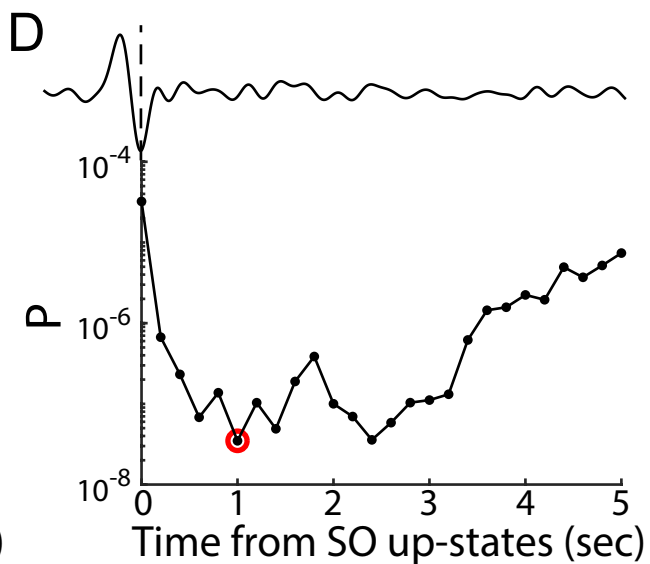

Supplement: NIHMS1538975-supplement-5.pdf [file NIHMS1538975-supplement-5.pdf]

**A**

CONTROL

OPTO<sub>SO+</sub>OPTO<sub>δ</sub>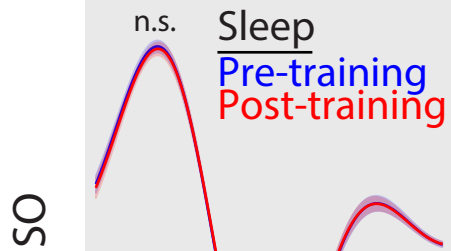

SO

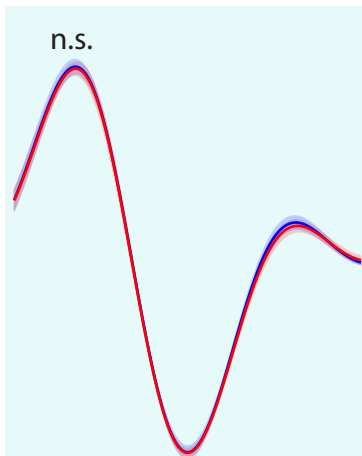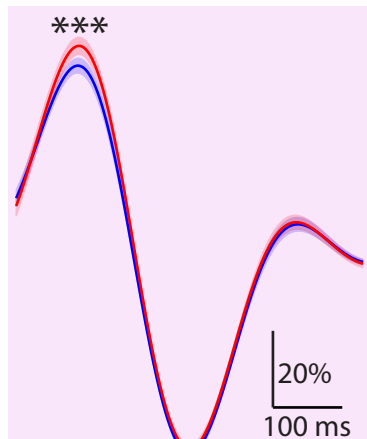**B**

δ

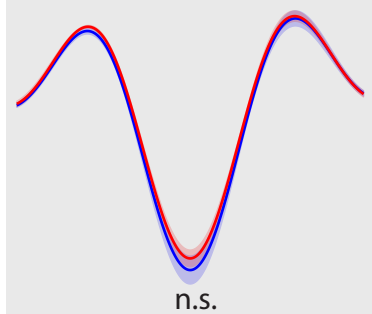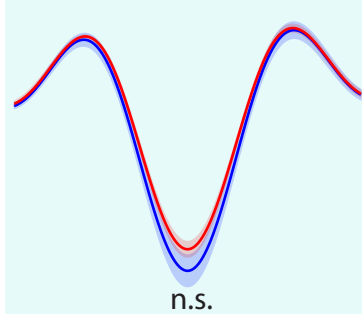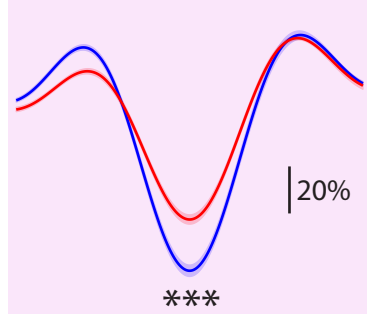

\*\*\*

\*\*

**C**

Spindles

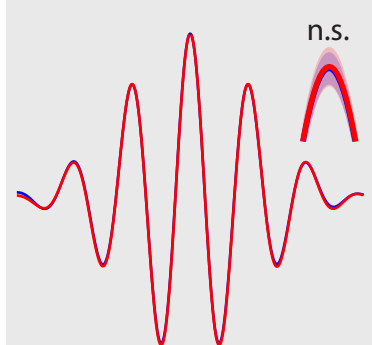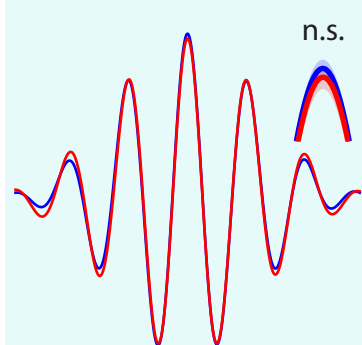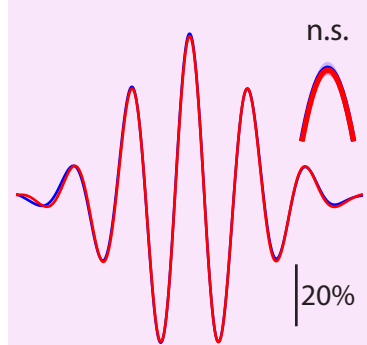

Supplement: NIHMS1538975-supplement-6.pdf [file NIHMS1538975-supplement-6.pdf]

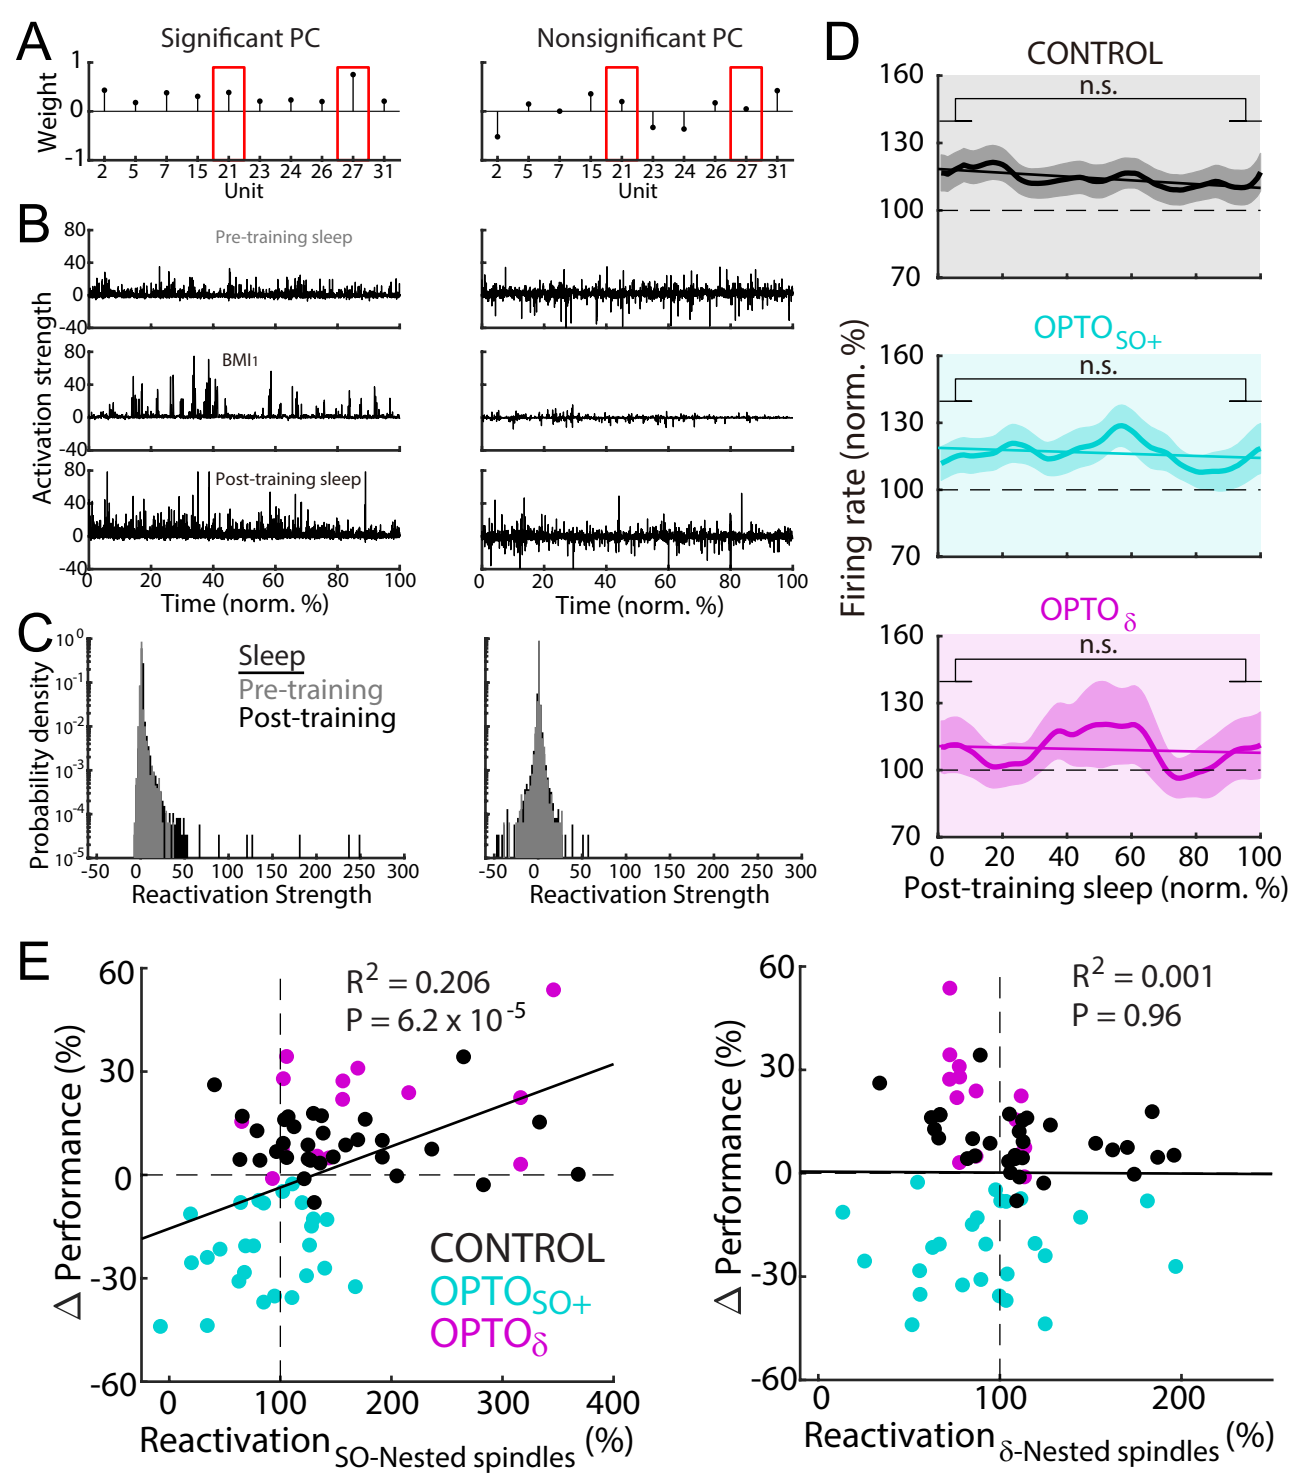

Supplement: NIHMS1538975-supplement-7.pdf [file NIHMS1538975-supplement-7.pdf]

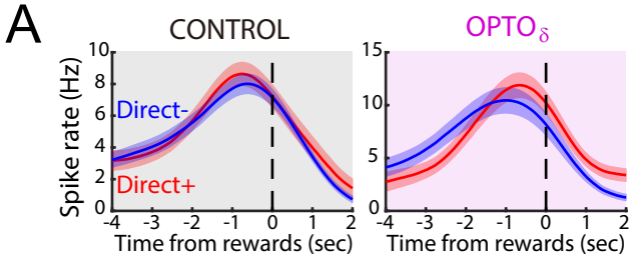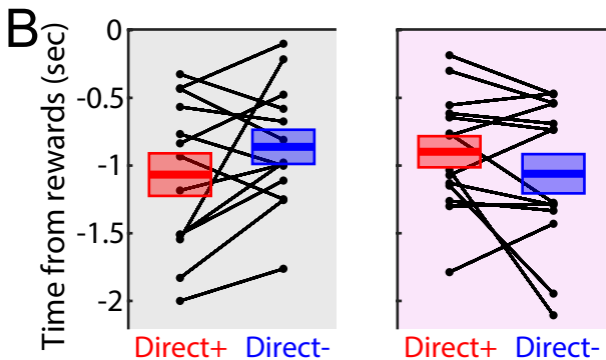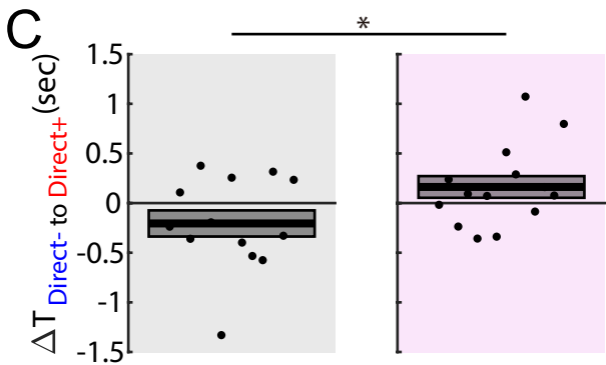

Supplement: NIHMS1538975-supplement-8.pdf [file NIHMS1538975-supplement-8.pdf]
